# Supplementary material for: Selective hydrogenation of furfural on Ru/Al-MIL-53: a comparative study on the effect of aromatic and aliphatic organic linkers
Source: Royal Society of Chemistry journal article supplement (doi:10.1039/c6ra21701j), 2016-01-01
Supplement: c6ra21701j1.pdf [file c6ra21701j1.pdf]

Supporting information to

**Selective hydrogenation of furfural on Ru/Al-MIL-53: a  
comparative study on the effect of aromatic and aliphatic  
organic linkers**

Jie Yang<sup>a,\*</sup>, Jianjun Ma<sup>a</sup>, Qingqing Yuan<sup>b</sup>, Pei Zhang<sup>b</sup>, Yejun Guan<sup>b,\*</sup>

a. School of Mathematics and Physics, Shanghai University of Electric Power,  
Shanghai, 200090, China

b. Shanghai Key Laboratory of Green Chemistry and Chemical Processes, School of  
Chemistry and Molecular Engineering, East China Normal University, Shanghai,  
200062, China

Figure Caption:

Figure S1. The XRD pattern of Ru/Al-MIL-53-ADP

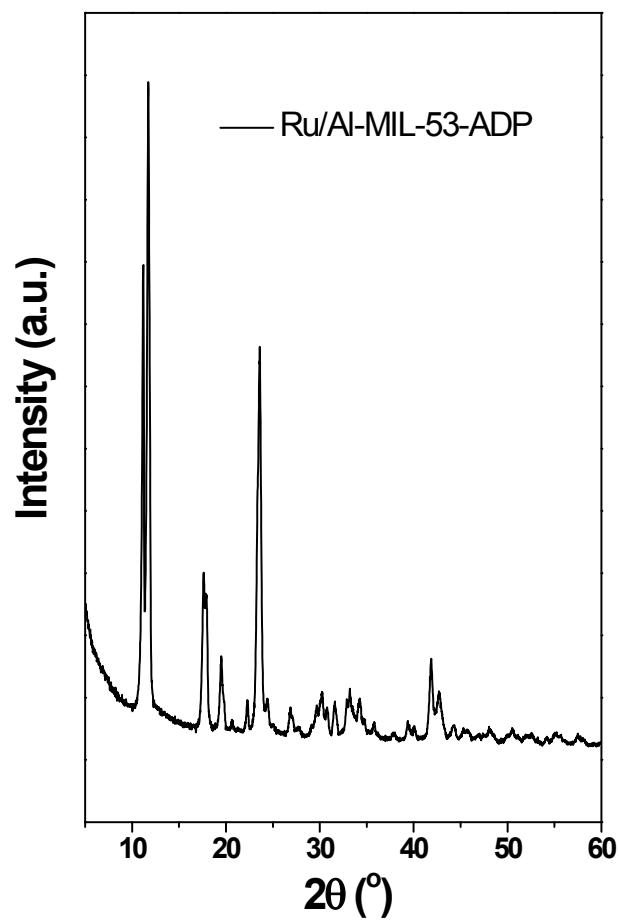

Fig. S1 The XRD pattern of Ru/Al-MIL-53-ADP
